# Supplementary material for: High-molecular-weight dissolved organic matter enhanced phosphorus availability in paddy soils: Evidence from field and microcosm experiments
Source: Preprints.org preprint supplement (doi:10.20944/preprints202309.2078.v1), 2023-10-03
Supplement: Supplementary file 1 [file supplementary]

**Supplementary Materials for**

**High-molecular-weight dissolved organic matter enhanced phosphorus availability in paddy soils: Evidence from field and microcosm experiments**

Hai-Bo Wanga, Xi-Peng Liub, Bing-Jie Jinc,d, Yu-Chen Shua, Cheng-Liang Suna, Yong-Guan Zhua,c, Xian-Yong Lina*

*aMOE Key Laboratory of Environment Remediation and Ecological Health, College of Environmental and Resource Sciences, Zhejiang University, Hangzhou 310058, PR China.*

*bMicrobial Ecology cluster, Genomics Research in Ecology and Evolution in Nature (GREEN), Groningen Institute for Evolutionary Life Sciences (GELIFES), University of Groningen, 9747 AG Groningen, The Netherlands*

*cKey Lab of Urban Environment and Health, Institute of Urban Environment, Chinese Academy of Sciences, Xiamen 361021, PR China*

*dYangtze Delta Region Healthy Agriculture Institute, Jiaxing 314500, PR China*

*Corresponding author:

Xian-Yong Lin, College of Environmental and Resource Sciences, Zhejiang University, Hangzhou, 310058, China

E-mail: [xylin@zju.edu.cn](mailto:xylin@zju.edu.cn), Tel: +86-571-88982476, Fax: +86-571-86971395

**Text S1**

**Soil** **physicochemical properties**

The soil type is a reddish paddy soil with the following physicochemical properties: pH 5.68; total organic carbon, 28.5 g∙kg-1; total nitrogen (N), 1.58 g∙kg-1; total P, 0.68 g∙kg-1; total potassium (K), 2.33 g∙kg-1;available N, 138.2 mg∙kg-1;available P, 10.4 mg∙kg-1;andavailable K, 75.2 mg∙kg-1.

**Text S2**

**Model for isotherm fitting**

The Langmuir model is expressed as equation:

Where Q and Qm are the amount of the P equilibrium adsorption capacity and the maximum sorption capacity (mg∙kg-1), respectively; k (L∙mg-1) is a constant related to the binding strength of P at the adsorption sites.

**Text S3**

**Calculation for indicators of DOM from Ultraviolet (UV)-visible spectroscopy (UV-vis) and excitation-emission matrix (EEM) fluorescence spectroscopy**

The specific UV absorbance at 254 nm (SUVA254) and 260 nm (SUVA260) was determined by taking the absorbance of a DOM sample at 254 and 260 nm and dividing it by the DOC contents, recorded as L∙mg∙C-1∙m-1:

SVUA254 = ABS254÷C×100 (1)

SVUA260 = ABS260÷C×100 (2)

SR=S275-295÷S350-400 (3)

The humification index (HIX) and fluorescence index (FI) were calculated, respectively. HIX was calculated by comparing the sum of fluorescence intensity at wavelength 435-480 nm to the sum of fluorescence intensity at wavelength 435-480nm and 300-345 nm using an excitation wavelength at 254 nm. FI was calculated as the ratio of emission intensity at 450 nm and 500 nm under the excitation wavelength of 370 nm:

(4)

(5)

**Test S4** **Operation details of** **DOM** **characterization**

As described by Li et al. (2022), to investigate variations in the chemical composition of DOM derived from soil samples, organic manure and crop straw, ultraviolet-visible (UV–vis) absorption spectra and excitation-emission matrices-parallel factor analysis (EEM-PARAFAC) were applied. Prior to the UV and fluorescence measurements, all DOM solutions were diluted to possess an absorbance of <0.1 at 254 nm to minimize the ‘inner filter effect’ (IFE). The UV–visible absorbance spectra were obtained using a UV–Vis spectrometer (UV2450, Shimadzu, Japan) from λ = 200 to 800 nm at 1 nm intervals and using Milli-Q water as a blank with a 1 cm quartz cuvette. Fluorescence measurements were carried out using a fluorophotometer (Hitachi F-4600) in a 1 cm quartz cuvette at an ambient temperature of 25 ± 1 °C. The excitation and emission scanning ranges were 200–500 nm with 5 nm increments and 250–600 nm with 5 nm increments. Milli-Q water (EEM) was used as the control. PARAFAC modeling was performed to group and identify the fluorescence components using the DOMFluor toolbox in MATLAB 2017a (MathWorks, Natick, MA, USA) (Stedmon and Bro, 2008). The number of PARAFAC components was determined by a split-half analysis, and the final EEMs were normalized by the Raman integrated area (in the Raman unit, RU). The complete PARAFAC model results were compared to the OpenFluor online database (Murphy et al., 2014). The maximum fluorescence intensity (Fmax) was assumed to be a proxy for the relative abundance of each fluorescent component (Murphy et al., 2013).

**Table S1.** Fertilizer application rates and fertilizer types of each fertilization regimes.

|  | Treatment | Nutrient inputs（kg ha-1 y-1） | | | | | | | | | | |  |  |  |
| --- | --- | --- | --- | --- | --- | --- | --- | --- | --- | --- | --- | --- | --- | --- | --- |
|  | Mineral fertilizer | | | | Organic mature | | | | Crop straw | | |  | Total |  |
| Season | N | P2O5 | K2O | N | | P2O5 | K2O | N | | P2O5 | K2O | N | P2O5 | K2O |
|  | CK | 0 | 0 | 0 | — | | — | — | — | | — | — | 0 | 0 | 0 |
| Rice | NPK | 225.0 | 120.0 | 120.0 | — | | — | — | — | | — | — | 225.0 | 120.0 | 120.0 |
|  | OM | 195.6 | 78.8 | 100.3 | 29.4 | | 26.2 | 19.7 | — | | — | — | 225.0 | 105.0 | 120.0 |
|  | CS | 195.7 | 85.3 | 62. 2 | — | | — | — | 29.3 | | 19.7 | 57.8 | 225.0 | 105.0 | 120.0 |
|  | CK | 0 | 0 | 0 | **—** | | **—** | **—** | **—** | | **—** | **—** | 0 | 0 | 0 |
| Wheat | NPK | 112.5 | 36.0 | 60.0 | **—** | | **—** | **—** | **—** | | **—** | **—** | 112.5 | 36.0 | 60.0 |
|  | OM | 103.7 | 23.6 | 54.1 | 8.8 | | 7.9 | 5.9 | — | | — | — | 112.5 | 31.5 | 60.0 |
|  | CS | 87.6 | 13.2 | 12.1 | — | | — | — | 24.9 | | 18.3 | 47.9 | 112.5 | 31.5 | 60.0 |

**Table S2.** Different fractions of soil P in the paddy soils (0–20 cm) under different fertilization regimes.

|  | H2O-P | NaHCO3-Pi | NaOH-Pi | HCl-P | Residual-P | NaHCO3-Po | NaOH-Po |
| --- | --- | --- | --- | --- | --- | --- | --- |
| CK | 2.78±  0.42b | 17.28±  2.89b | 104.00±  7.91c | 115.14±  6.85a | 223.18±  4.58ab | 9.06±  3.78c | 86.52±  21.85a |
| NPK | 3.73±  0.09a | 31.41±  3.05a | 160.74±  3.29a | 142.56±  7.77a | 225.96±  14.25a | 18.31±  1.48b | 74.80±  1.35a |
| OM | 3.76±  0.07a | 38.47±  1.82a | 128.16±  3.32b | 131.92±  4.45a | 171.54±  8.39c | 21.80±  0.46b | 88.29±  13.22a |
| CS | 3.82±  0.29a | 35.25±  3.97a | 137.69±  6.69b | 124.73±  5.56a | 195.35±  15.25bc | 30.95±  3.09a | 86.36±  7.72a |

Different letters within a column are significantly different at *P* < 0.05 (Tukey’s test).

**Table S3.** P sorption characteristics of the paddy soils (0–20 cm) treated by different fertilization treatments as described by the Langmuir equation.

| Treatments | Langmuir model | |  |
| --- | --- | --- | --- |
|  | Qm (mg kg-1) | k (L mg-1) | L-R2 |
| CK | 1152.74±48.93a | 0.117±0.008a | 0.90 |
| NPK | 1063.37±51.98a | 0.119±0.008a | 0.99 |
| OM | 775.02±45.44b | 0.065±0.018b | 0.94 |
| CS | 858.39±49.07b | 0.072±0.018b | 0.99 |

Different letters within a column are significantly different at *P* < 0.05 (Tukey’s test).

Qm, the maximum phosphorus (P) sorption capacity; k, P bonding energy.

**Table S4.** Dissolved organic matter properties from ultraviolet-visible and excitation−emission matrix spectroscopy under different fertilization regimes.

| Treatment | SR | HIX | FIX | SUVA254 | SUVA260 |
| --- | --- | --- | --- | --- | --- |
| CK | 1.09±0.024a | 1.03±0.06c | 1.43±0.02a | 0.72±0.037bc | 0.69±0.034bc |
| NPK | 1.08±0.003a | 1.01±0.18c | 1.68±0.16a | 0.56±0.030c | 0.53±0.029c |
| OM | 0.85±0.004c | 1.62±0.02a | 1.72±0.17a | 1.17±0.002a | 1.13±0.002a |
| CS | 0.99±0.007b | 1.29±0.09b | 1.62±0.10a | 0.95±0.191ab | 0.92±0.189ab |

Different letters within a column are significantly different at P < 0.05 (Tukey’s test).

SR, the ratio of the slope (275-295nm slope: 350-400nm slope), used as an indicator for the molecular weight in DOM, and lower values indicate increasing molecular weight; HIX, humification index, reflecting the humification degree of DOM; FIX, fluorescence index, defined as a surrogate for the origin of DOM, characterizing DOM derived from terrestrial sources (degraded plant and soil organic matter with lower FI value) and microbial source (extracellular release and leachate from bacteria and algae with higher FI value); SUVA254, specific UV absorbance at 254 nm, as an indicator of aromaticity; SUVA260, specific UV absorbance at 260 nm, as an indicator of hydrophobicity;

**Table S5.** Properties of MW-fractionated DOM

| MW-fractions | SR | HIX | FIX | SUVA254 | SUVA260 |
| --- | --- | --- | --- | --- | --- |
| M-DOM | 0.35±0.008d | 4.00±0.27b | 2.18±0.06a | 2.45±0.02a | 2.31±0.03a |
| M-LMW | 0.40±0.001c | 2.58±0.12c | 2.20±0.03a | 0.88±0.01d | 0.67±0.01d |
| M-HMW | 0.32±0.006d | 4.61±0.09a | 1.93±0.02b | 2.61±0.03a | 2.32±0.02a |
| S-DOM | 0.69±0.026 b | 0.96±0.01d | 1.44±0.05d | 1.48±0.01c | 1.42±0.01c |
| S-LMW | 0.83±0.037a | 0.51±0.01e | 1.62±0.04c | 0.41±0.01e | 0.40±0.01e |
| S-HMW | 0.35±0.001cd | 1.24±0.19d | 1.45±0.06d | 1.99±0.02b | 1.78±0.03b |

Different letters within a column are significantly different at *P* < 0.05 (Tukey’s test). The abbreviations were presented in Table S4.

**Table S6.** Relations between soil P sorption isotherm parameters and DOM composition from different MW-fractionated DOM (n = 18)

|  | C1 | C2 | C3 | C4 |
| --- | --- | --- | --- | --- |
| Qm | -0.624** | -0.375 | 0.603** | -0.647** |
| k | 0.121 | 0.562* | -0.334 | 0.389 |

Correlation (Pearson) is significant at the 0.05 (*) and 0.01 (**) levels. C1, C2 represent humic-like substances, C3 represents tyrosine-like component, and C4 represents tryptophan-like component.


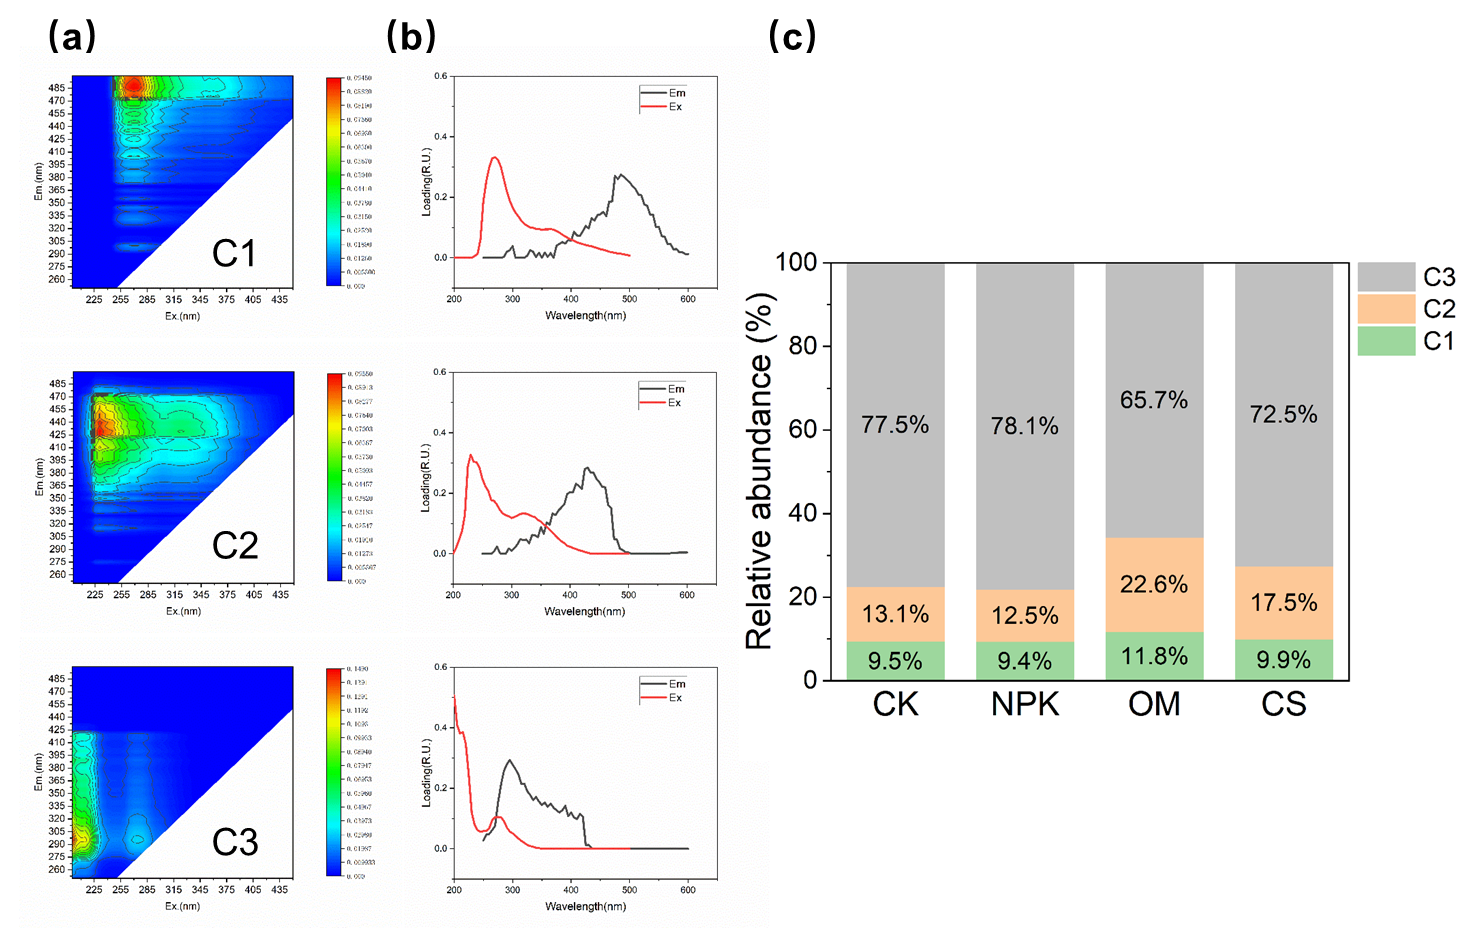


**Fig. S1.** Characteristic of EEM-PARAFAC components of DOM in the paddy soils (0–20 cm) under different fertilization regimes: Spectra (a) and loading (b) of fluorescence components (C1–C3) of dissolved organic matter (DOM) by 3D-EEM spectroscopy and parallel factor analysis; (c) Proportion of each component based on fluorescence intensity; C1, C2 represent humic-like substances, and C3 represents tyrosine-like component.


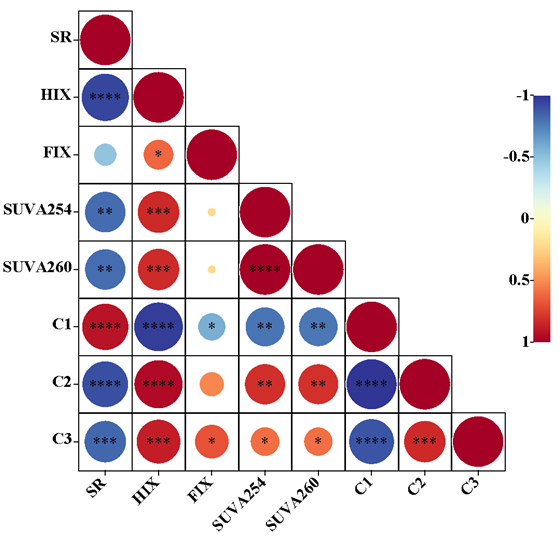


**Fig. S2.** Correlation heatmap (Pearson) of DOM spectral indexes. ⁎ *P* < 0.05, ⁎⁎ *P* < 0.01, ⁎⁎⁎ *P* < 0.001. The abbreviations were presented in Table S4 and Fig. S1.


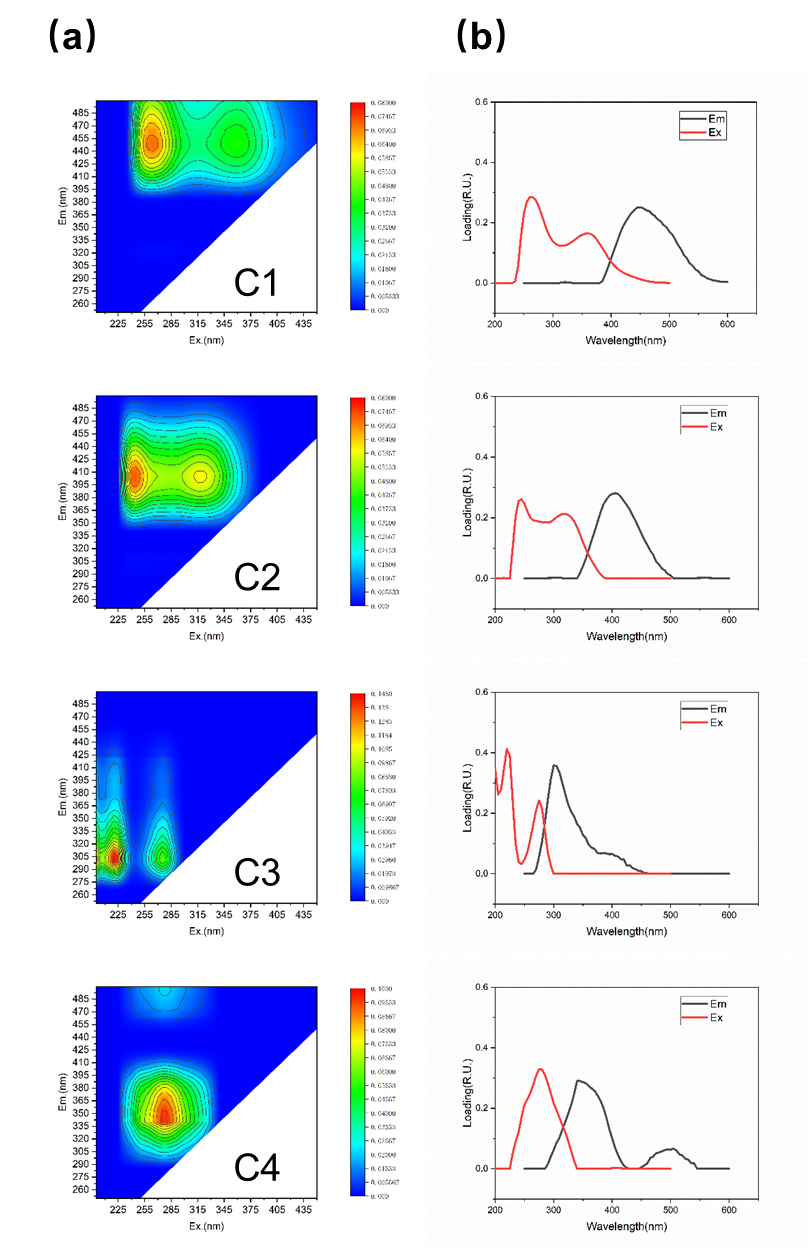


**Fig. S3.** Characteristic of EEM-PARAFAC components of MW-fractionated DOM from organic mature (M-DOM) or crop straw (S-DOM): Spectra (a) and loading (b) of fluorescence components (C1–C4) of dissolved organic matter (DOM) by 3D-EEM spectroscopy and parallel factor analysis. C1, C2 represent humic-like substances, C3 represents tyrosine-like component, and C4 represents tryptophan-like component.


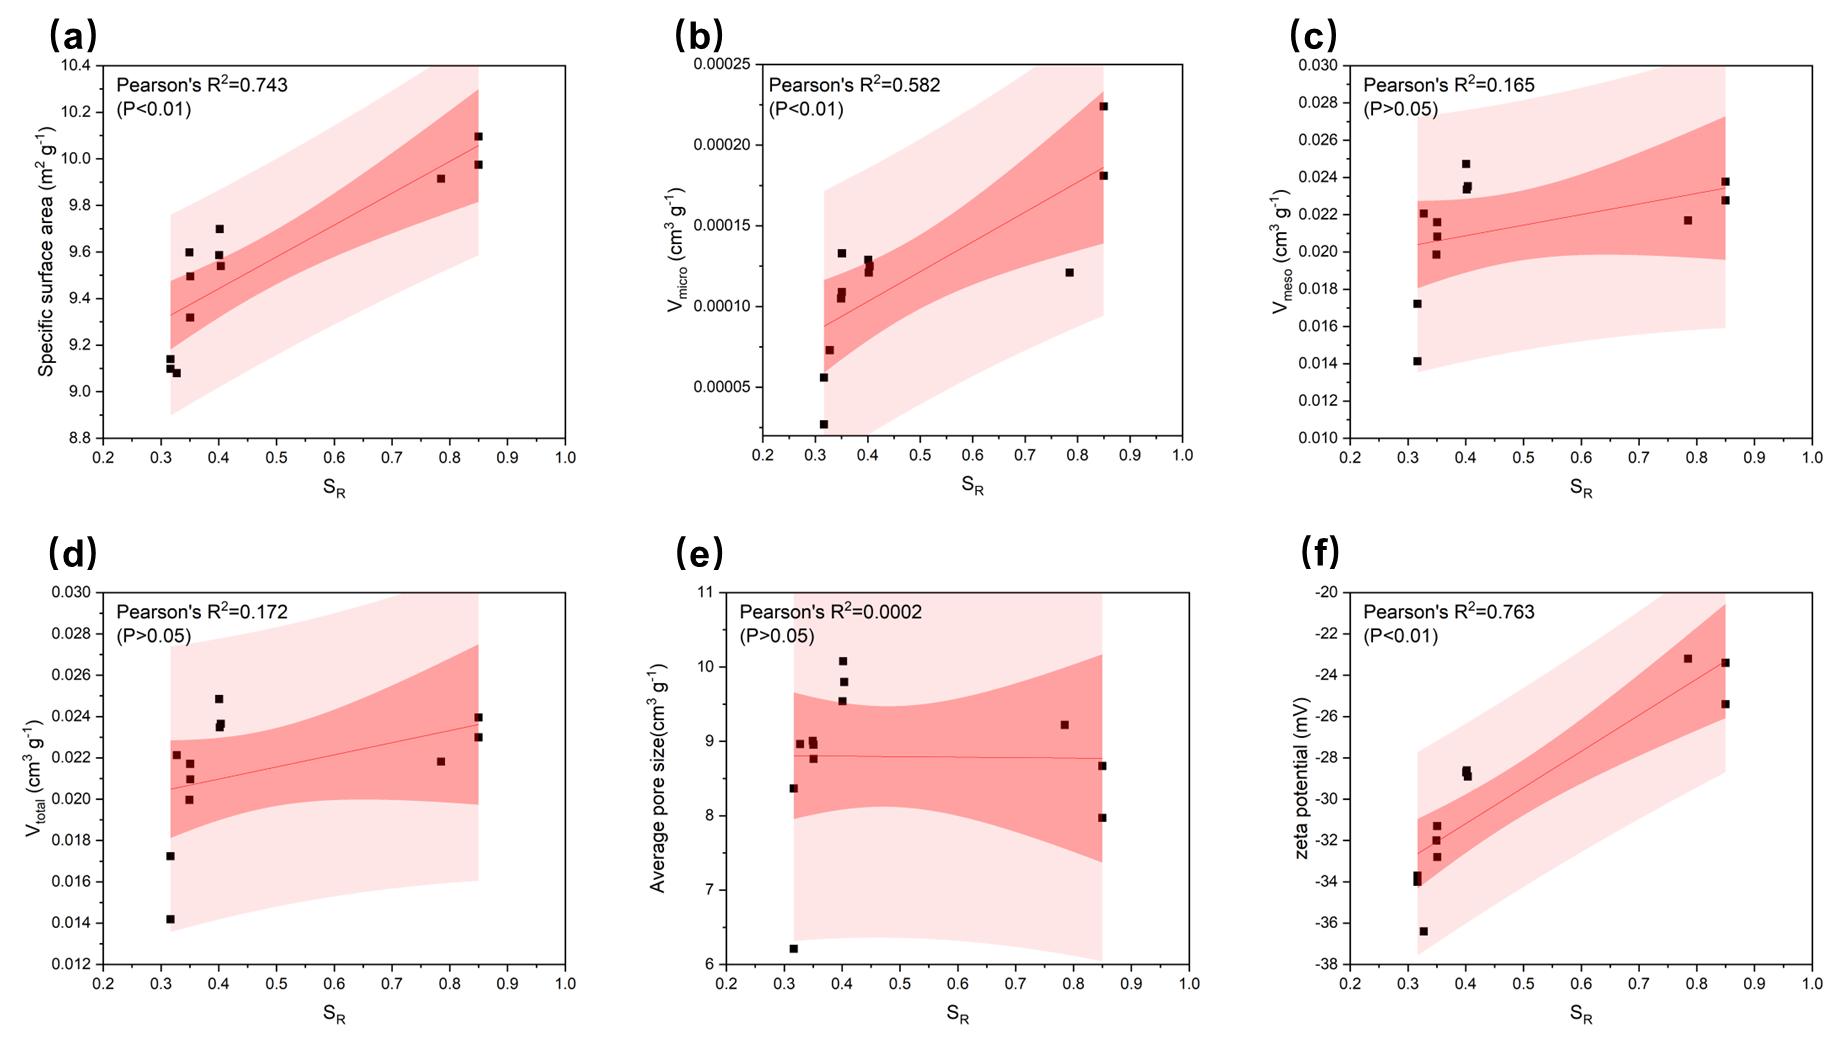


**Fig. S4.** The relationships between the DOM molecular weight (SR) and soil specific surface area (a), Vmicro (b), Vmeso (c), Vtotal (d), average pore size (e), zeta potential (f).

Vtotal, total pore volume; Vmicro, micro pore volume; Vmeso, mesoporous pore volume.

**References**

Li, K., Bi, Q., Liu, X., Wang, H., Sun, C., Zhu, Y., Lin, X., 2022. Unveiling the role of dissolved organic matter on phosphorus sorption and availability in a 5-year manure amended paddy soil. Sci Total Environ 838(Pt 1), 155892.

Murphy, K.R., Stedmon, C.A., Graeber, D., Bro, R., 2013. Fluorescence spectroscopy and multi-way techniques. PARAFAC. Analytical Methods 5(23).

Murphy, K.R., Stedmon, C.A., Wenig, P., Bro, R., 2014. OpenFluor– an online spectral library of auto-fluorescence by organic compounds in the environment. Anal. Methods 6(3), 658-661.

Stedmon, C.A., Bro, R., 2008. Characterizing dissolved organic matter fluorescence with parallel factor analysis: a tutorial. Limnology and Oceanography: Methods 6(11), 572-579.
